# Supplementary material for: Cardiac Cell Exposure to Electromagnetic Fields: Focus on Oxdative Stress and Apoptosis
Source: MDPI journal article supplement (doi:10.3390/biomedicines10050929), 2022-04-19
Supplement: s1 [file s1]

**Supplementary Table S1.** Real-time PCR primer sequences.

| <b>Genes</b> | <b>Forward Sequence<br/>(5'-3')</b> | <b>Reverse Sequence<br/>(5'-3')</b> |
|--------------|-------------------------------------|-------------------------------------|
| GAPDH        | CTTTGTCAAGCTCATTT<br>CCTGG          | TCTTGCTCAGTGCCT<br>TGC              |
| RPLP0        | TGACATCGTCTTTAAAC<br>CCCG           | TGTCTGCTCCCACAAT<br>GAAG            |
| BAX          | GGCGAATTGGAGATGA<br>ACTG            | CCCCAGTTGAAGTTGC<br>CAT             |
| BCL2         | GATGACTGAGTACCTG<br>AACCG           | CAGAGACAGCCAGGA<br>GAAATC           |
| CASPASE 3    | GACTGATGAGGAGATG<br>GCTTG           | TGCAAAGGGACTGGA<br>TGAAC            |
| CASPASE 8    | AACTTCCTAGACTGCA<br>ACCG            | TCTCAATTCCAACCTCG<br>CTCAC          |
| CATALASE     | GAACAGATGGCTTTTG<br>ACCC            | GTAGGGACAGTTCAC<br>AGGTATC          |
| SOD2         | GGACAAACCTGAGCCC<br>TAAG            | CAAAAGACCCAAAGT<br>CACGC            |
